# Supplementary material
Source: publisher figshare collection journal article supplement (https://gsajournals.figshare.com/ndownloader/files/26384557)
Supplement: Supplementary file 1 [file 26384557]

## Sheet: S3. DeletedinOtherClade2
Supplementary Table 3. B8441 (Clade I) regions not present in isolates from C. auris Clade II of length > 5kb
Region ID	strain	type	coordinates	length	normalizedRD	p-val
del1	B14308	deletion	scaffold00001:3169001-3196000	27000	0.00422661	5.90269e-12
del1	B11220	deletion	scaffold00001:3169001-3196000	27000	0.0469426	5.90269e-12
del1	B11808	deletion	scaffold00001:3169001-3196000	27000	0.0593283	5.90269e-12
del1	B11809	deletion	scaffold00001:3169001-3196000	27000	0.0536592	5.90269e-12
del1	B12043	deletion	scaffold00001:3169001-3196000	27000	0.0620341	5.90269e-12
del1	B12081	deletion	scaffold00001:3169001-3196000	27000	0.0503478	5.90269e-12
del1	B13463	deletion	scaffold00001:3169001-3196000	27000	0.0614059	5.90269e-12
del2	B14308	deletion	scaffold00005:846001-855000	9000	0.0371117	8.88907e-06
del2	B11220	deletion	scaffold00005:846001-855000	9000	0.0384871	1.73297e-05
del2	B11808	deletion	scaffold00005:846001-855000	9000	0.0479114	3.16377e-05
del2	B11809	deletion	scaffold00005:846001-855000	9000	0.0468781	8.83706e-05
del2	B12043	deletion	scaffold00005:846001-855000	9000	0.0430741	3.85014e-05
del2	B12081	deletion	scaffold00005:846001-855000	9000	0.0296477	3.62211e-06
del2	B13463	deletion	scaffold00005:846001-855000	9000	0.0278224	3.10376e-06
del3	B14308	deletion	scaffold00005:1010001-1048000	38000	0.00146494	4.19401e-12
del3	B11220	deletion	scaffold00005:1010001-1048000	38000	0.00618912	4.19401e-12
del3	B11808	deletion	scaffold00005:1003001-1048000	45000	0.0129084	3.54161e-12
del3	B11809	deletion	scaffold00005:1003001-1048000	45000	0.012604	3.54161e-12
del3	B12043	deletion	scaffold00005:1010001-1048000	38000	0.00431613	4.19401e-12
del3	B12081	deletion	scaffold00005:1010001-1048000	38000	0.00436492	4.19401e-12
del3	B13463	deletion	scaffold00005:1010001-1048000	38000	0.00818696	4.19401e-12
del4	B14308	deletion	scaffold00006:6001-22000	16000	0.0349662	9.96078e-12
del4	B11220	deletion	scaffold00006:6001-22000	16000	0.0626713	1.63357e-09
del4	B11808	deletion	scaffold00006:7001-22000	15000	0.0434767	1.06248e-11
del4	B11809	deletion	scaffold00006:7001-22000	15000	0.0392714	1.06248e-11
del4	B12043	deletion	scaffold00006:7001-22000	15000	0.0314772	1.06248e-11
del4	B12081	deletion	scaffold00006:7001-22000	15000	0.0278849	1.06248e-11
del4	B13463	deletion	scaffold00006:7001-24000	17000	0.109802	1.12614e-06
del5	B14308	deletion	scaffold00006:961001-1008000	47000	0.0515813	3.3909e-12
del5	B11220	deletion	scaffold00006:958001-1008000	50000	0.103777	3.18745e-12
del5	B11808	deletion	scaffold00006:958001-1008000*	50000	0	6.94545e-07
del5	B11809	deletion	scaffold00006:958001-1008000*	50000	0	1.0808e-06
del5	B12043	deletion	scaffold00006:957001-1008000	51000	0.157581	1.16267e-07
del5	B12081	deletion	scaffold00006:957001-1008000	51000	0.0970033	3.12495e-12
del5	B13463	deletion	scaffold00006:957001-1008000	51000	0.159569	8.57055e-07
del6	B14308	deletion	scaffold00007:1-34000	34000	0.00712217	4.68743e-12
del6	B11220	deletion	scaffold00007:1-35000	35000	0.00357067	4.5535e-12
del6	B11808	deletion	scaffold00007:1-35000	35000	0.00834915	4.5535e-12
del6	B11809	deletion	scaffold00007:1-35000	35000	0.0102348	4.5535e-12
del6	B12043	deletion	scaffold00007:1-34000	34000	0.0119867	4.68743e-12
del6	B12081	deletion	scaffold00007:1-34000	34000	0.0110295	4.68743e-12
del6	B13463	deletion	scaffold00007:1-33000	33000	0.00126465	4.82947e-12
del7	B14308	deletion	scaffold00008:1-11000	11000	0.014423	1.44884e-11
del7	B11220	deletion	scaffold00008:1-11000	11000	0.0166393	1.44884e-11
del7	B11808	deletion	scaffold00008:1-11000	11000	0.0170084	1.11561e-09
del7	B11809	deletion	scaffold00008:1-10000	10000	0.0177119	2.00809e-09
del7	B12043	deletion	scaffold00008:1-12000	12000	0.00497009	1.3281e-11
del7	B12081	deletion	scaffold00008:1-12000	12000	0.0111179	1.3281e-11
del7	B13463	deletion	scaffold00008:1-9000	9000	0.0488999	0.000277483
del8	B14308	deletion	scaffold00009:1-20000	20000	0.00278338	7.96863e-12
del8	B11220	deletion	scaffold00009:1-22000	22000	0.00724614	7.24421e-12
del8	B11808	deletion	scaffold00009:1-22000	22000	0.0172514	7.24421e-12
del8	B11809	deletion	scaffold00009:1-22000	22000	0.00461343	7.24421e-12
del8	B12043	deletion	scaffold00009:1-21000	21000	0.0210637	7.58917e-12
del8	B12081	deletion	scaffold00009:1-20000	20000	0.000360581	7.96863e-12
del8	B13463	deletion	scaffold00009:1-22000	22000	0.0124166	7.24421e-12
del9	B14308	deletion	scaffold00009:765001-777000	12000	0.0067265	1.3281e-11
del9	B11220	deletion	scaffold00009:765001-777000	12000	0.0116445	1.3281e-11
del9	B11808	deletion	scaffold00009:765001-777000	12000	0.00430609	1.3281e-11
del9	B11809	deletion	scaffold00009:765001-777000	12000	0.00679953	1.3281e-11
del9	B12043	deletion	scaffold00009:765001-777000	12000	0.000414174	1.3281e-11
del9	B12081	deletion	scaffold00009:765001-777000	12000	0.000300484	1.3281e-11
del9	B13463	deletion	scaffold00009:766001-777000	11000	0.00172453	1.44884e-11
del10	B14308	deletion	scaffold00010:8001-21000	13000	0.0164862	1.22594e-11
del10	B11220	deletion	scaffold00010:8001-21000	13000	0.0237685	1.22594e-11
del10	B11808	deletion	scaffold00010:9001-21000	12000	0.010691	1.3281e-11
del10	B11809	deletion	scaffold00010:9001-21000	12000	0.0109456	1.3281e-11
del10	B12043	deletion	scaffold00010:8001-21000	13000	0.0527594	4.33231e-06
del10	B12081	deletion	scaffold00010:8001-21000	13000	0.0321749	1.53243e-09
del10	B13463	deletion	scaffold00010:8001-21000	13000	0.0312272	3.55523e-09
del11	B14308	deletion	scaffold00011:25001-66000	41000	0.123419	3.88713e-12
del11	B11220	deletion	scaffold00011:22001-66000	44000	0.170888	3.6221e-12
del11	B11808	deletion	scaffold00011:25001-63000	38000	0.071789	4.19401e-12
del11	B11809	deletion	scaffold00011:21001-63000	42000	0.065247	3.79458e-12
del11	B12043	deletion	scaffold00011:24001-63000	39000	0.0683068	4.08647e-12
del11	B12081	deletion	scaffold00011:24001-63000	39000	0.0663838	4.08647e-12
del11	B13463	deletion	scaffold00011:26001-51000	25000	0.0018211	6.3749e-12
*Manual annotation

## Sheet: S3. Essential genes at subtelom
Supplementary Table 3. Essential genes (ie. null mutants inviable in C. albicans) in chromosome ends of C. auris B11220 (Clade II)
Chr_start
B11220 Contig	Gene_ID_B8441	Description	Gene	Gene_ID_B11220	Distance (bp)*	Gene # **	Note
Contig01	B9J08_001533	Has domain(s) with predicted oxidoreductase activity, oxidoreductase activity, acting on the aldehyde or oxo group of donors, NAD or NADP as acceptor activity and role in oxidation-reduction process	ALD5	CJI96_000002	3178	2	Inviable
Contig02	B9J08_000020	ATP synthase alpha subunit	ATP1	CJI96_001457	42245	20	Inviable
Contig03	B9J08_001960	Large subunit of DNA polymerase III	POL3	CJI96_002633	18331	8	Inviable
Contig04	B9J08_004907	Protein similar to S. cerevisiae Prp8, a component of the U4/U6-U5 snRNP complex	PRP8	CJI96_003697	44505	14	Inviable
Contig05	B9J08_004881	Ortholog(s) have polynucleotide 5'-hydroxyl-kinase activity	GRC3	CJI96_004270	2728	2	Inviable
Contig06	B9J08_005531	Alpha subunit of heterodimeric protein geranylgeranyltransferase type I and farnesyltransferase	RAM2	CJI96_004699	33227	9	Inviable
Contig07	B9J08_004119	Ortholog(s) have role in box C/D snoRNP assembly, protein folding, rRNA processing and R2TP complex	CR_10630W_A	CJI96_005145	30278	10	Inviable
Chr_end
B11220 Contig	Gene_ID_B8441	Description	Gene	Gene_ID_B11220	Distance (bp)*	Gene # **	Note
Contig01	B9J08_001049	Putative tRNA-Arg synthetase; essential; genes encoding ribosomal subunits, translation factors, and tRNA synthetases are downregulated upon phagocytosis by murine macrophage; downregulated by growth in the mouse cecum	C1_01530C_A	CJI96_001436	14976	4	Inviable
Contig02	B9J08_004095	Ortholog(s) have pantoate-beta-alanine ligase activity and role in pantothenate biosynthetic process	PAN6	CJI96_002622	3660	3	Inviable
Contig03	B9J08_001512	Putative nucleolar DEAD-box protein; Hap43-induced	DRS1	CJI96_003676	11202	7	Inviable
Contig04	.	.	.	.	.	.	.
Contig05	.	.	.	.	.	.	Ribosomal
Contig06	B9J08_002580	Ortholog(s) have RNA polymerase II complex binding, RNA polymerase II complex recruiting activity, RNA polymerase II general transcription initiation factor activity, TBP-class protein binding activity	SUA7	CJI96_005134	2892	2	Inviable
Contig07	B9J08_004456	Protein required for wild-type budding, hyphal growth, and virulence in a mouse systemic infection	BEM1	CJI96_005476	58098	22	Inviable
* Distance from telomere (bp)
** Gene # from telomere
